# Supplementary material for: Air-stable MXene/GaAs heterojunction solar cells with a high initial efficiency of 9.69%
Source: Royal Society of Chemistry journal article supplement (doi:10.1039/d1ta04194k), 2021-01-01
Supplement: d1ta04194k1.pdf [file d1ta04194k1.pdf]

## Supporting information

### Air-Stable MXene/GaAs Heterojunction Solar Cells with a High Initial Efficiency of 9.69%

Zhijie Zhang,<sup>a</sup> Jing Lin,<sup>a</sup> Peiye Sun,<sup>a</sup> Qinghao Zeng,<sup>a</sup> Xi Deng,<sup>ab</sup> Youtian Mo,<sup>a</sup> Jiaying Chen,<sup>a</sup> Yulin Zheng,<sup>a</sup> Wenliang Wang,<sup>\*ab</sup> and Guoqiang Li<sup>\*ab</sup>

<sup>a</sup>State Key Laboratory of Luminescent Materials and Devices, South China University of Technology, Guangzhou 510640, China. E-mail: wenliangwang@scut.edu.cn; msgli@scut.edu.cn

<sup>b</sup>Department of Electronic Materials, School of Materials Science and Engineering, South China University of Technology, Guangzhou 510640, China

Figures:

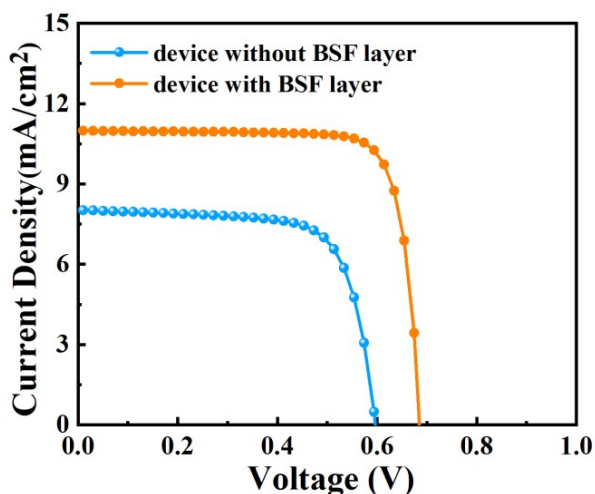

**Figure S1.** *J-V* curves of devices with and without InGaP BSF layer under AM 1.5 illumination. The concentration of  $\text{Ti}_3\text{C}_2\text{T}_x$  colloidal solution used here is 0.05mg/mL.

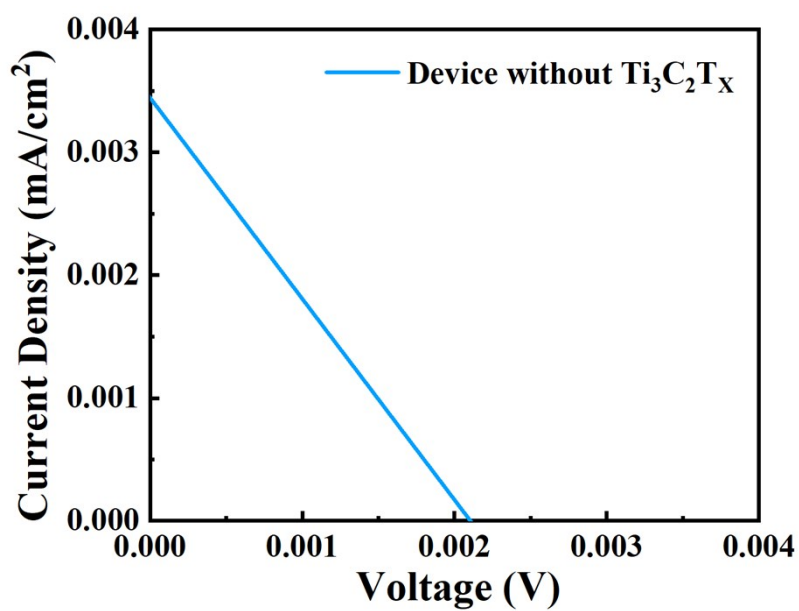

Figure S2.  $J$ - $V$  curve of device without  $\text{Ti}_3\text{C}_2\text{T}_x$  under AM 1.5 illumination.

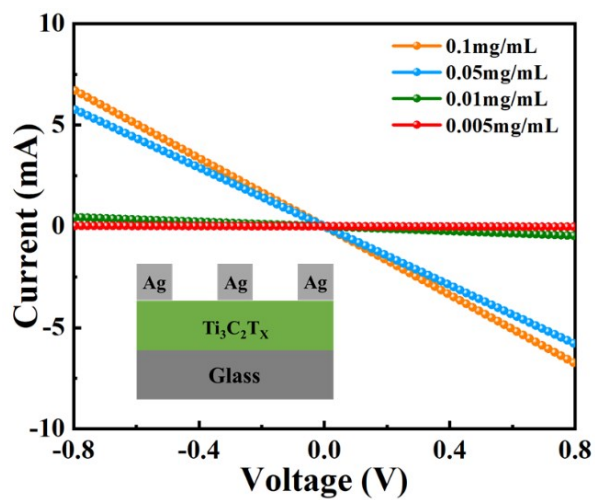

Figure S3.  $I$ - $V$  characteristics of  $\text{Ti}_3\text{C}_2\text{T}_x$  films prepared with various concentrations of  $\text{Ti}_3\text{C}_2\text{T}_x$  solution.

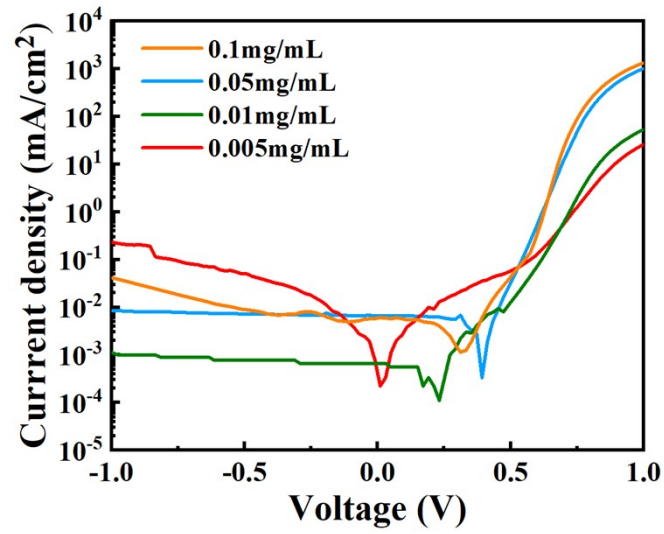

**FigureS4.**  $J$ - $V$  curves of devices fabricated by  $Ti_3C_2T_x$  colloidal solution with various concentrations under dark condition.

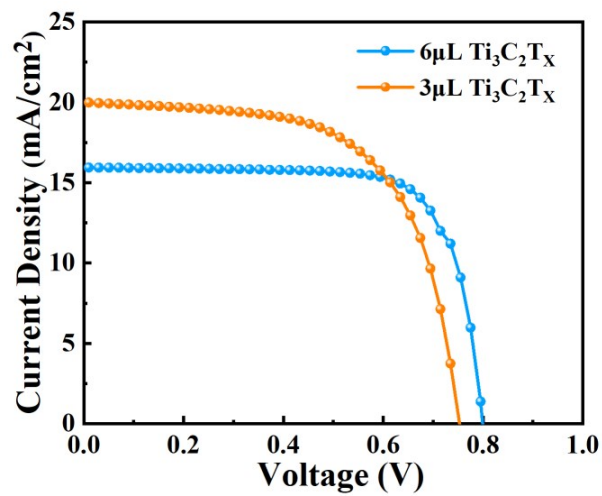

**Figure S5.**  $J$ - $V$  curves of devices fabricated with 6 and 3  $\mu$ L  $Ti_3C_2T_x$  colloidal solution under AM 1.5 illumination.

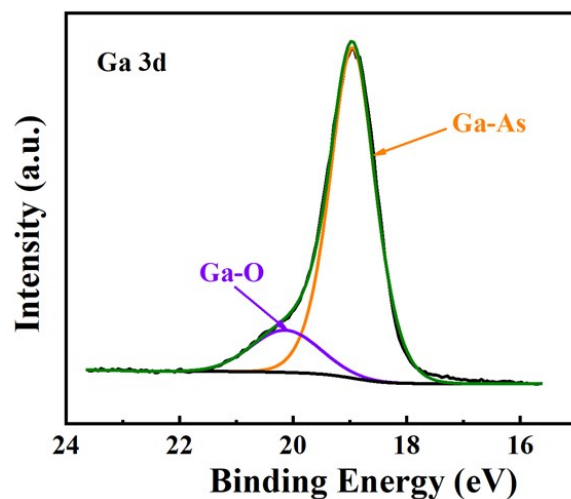

**FigureS6.** Ga 3d XPS spectra of MXene coated on GaAs substrate. Ga–As bond and Ga-O band is located at 18.96 eV and 20.15eV, respectively. The original proportion of Ga-O that represents the oxidation of GaAs surface is 15.25%

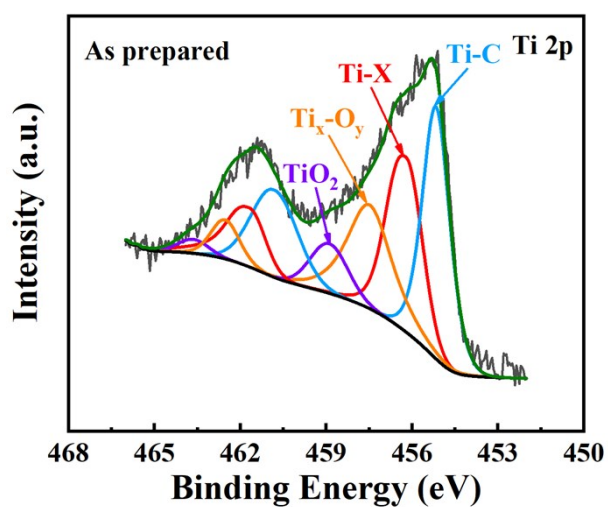

**Figure S7.** Ti 2p XPS spectra of as-prepared Ti<sub>3</sub>C<sub>2</sub>T<sub>x</sub> films

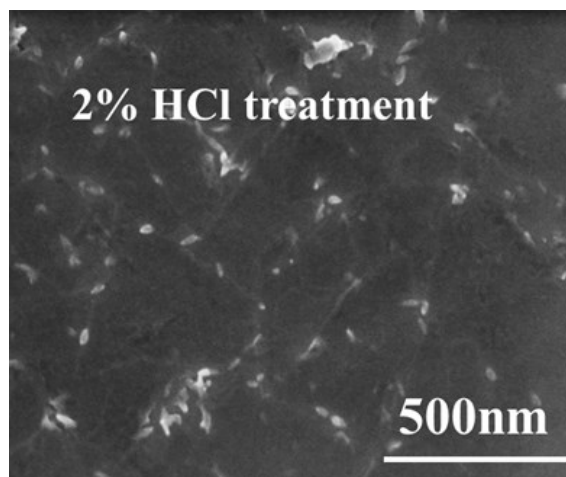

**Figure S8.** SEM image of 2% HCl treated  $\text{Ti}_3\text{C}_2\text{T}_x$  films

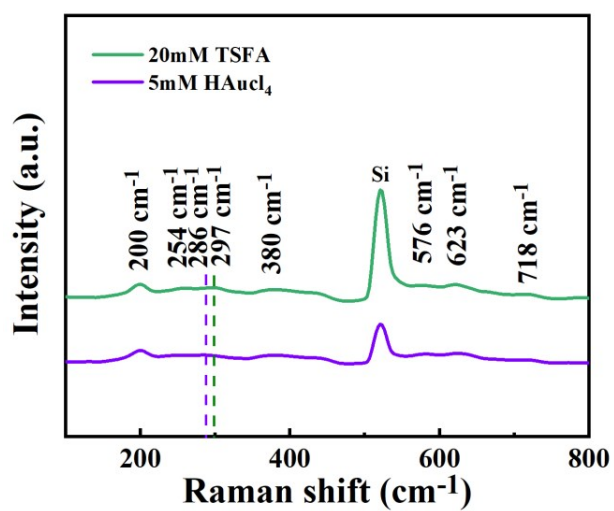

**Figure S9.** Raman spectra of TSFA and  $\text{HAuCl}_4$  treated  $\text{Ti}_3\text{C}_2\text{T}_x$  films coated on Si substrate. The Raman mode at  $520 \text{ cm}^{-1}$  correspond to the Si substrate.

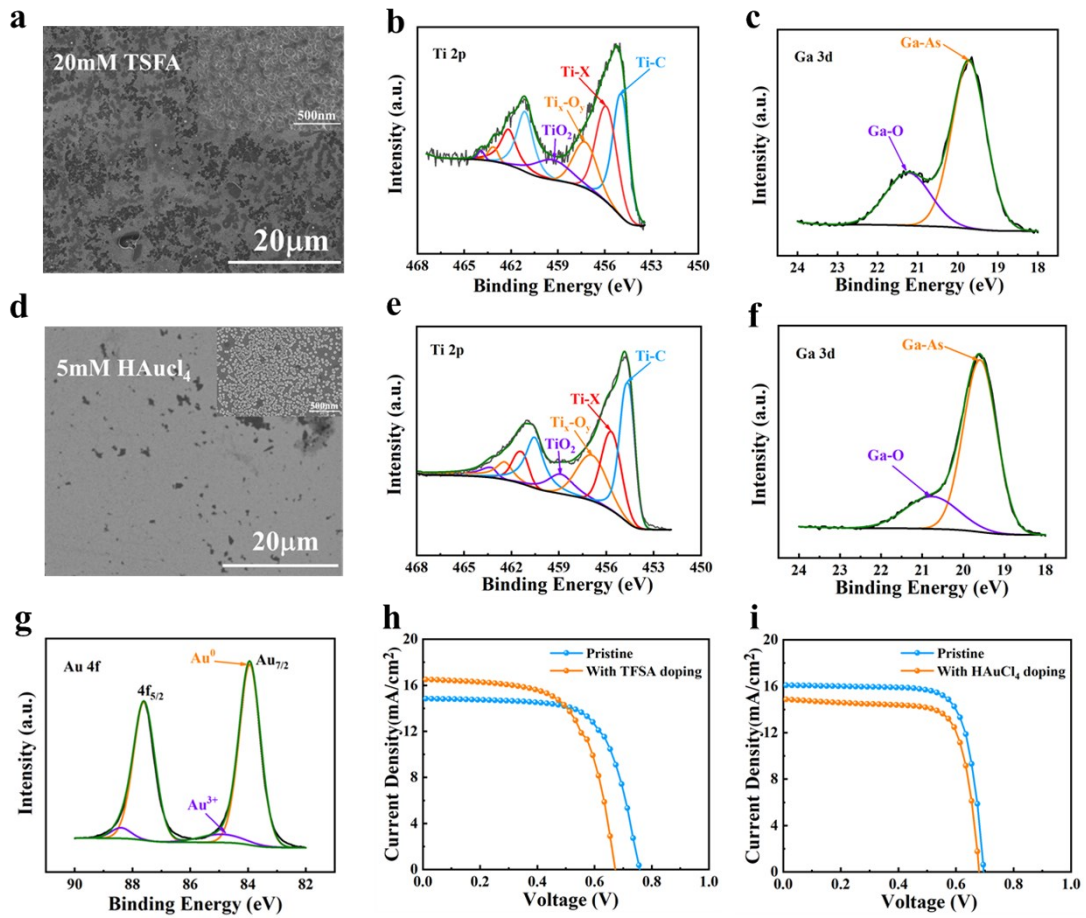

**Figure S10.** SEM images (a and d), Ti 2p XPS spectra (b and e) and Ga 3d XPS spectra (c and f) of 20mM TSFA and 5mM HAuCl<sub>4</sub> treated Ti<sub>3</sub>C<sub>2</sub>T<sub>x</sub> films. The proportion of TiO<sub>2</sub> and Ga-O is increased to 10.13% and 29.08% after 20mM TSFA treated. For the HAuCl<sub>4</sub> treated devices, the proportion of TiO<sub>2</sub> and Ga-O is increased to 9.68% and 23.08%. g) Au 4f XPS spectra of 5mM HAuCl<sub>4</sub> treated Ti<sub>3</sub>C<sub>2</sub>T<sub>x</sub> films. *J-V* curves of devices with and without h) 20mM TSFA and i) 5mM HAuCl<sub>4</sub> treated.

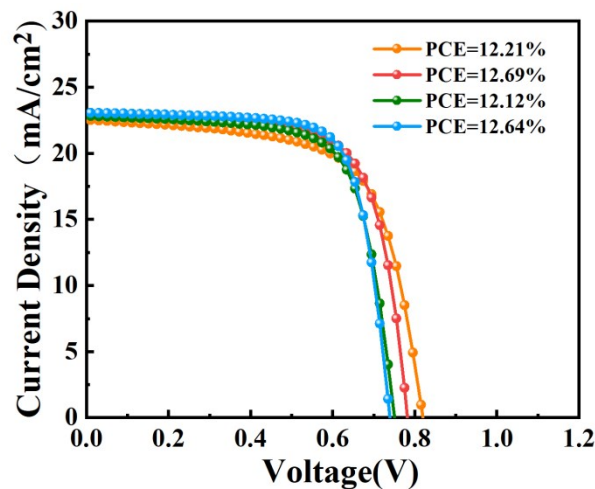

**Figure S11.** *J-V* curves of Ti<sub>3</sub>C<sub>2</sub>T<sub>x</sub>/GaAs solar cells with ZnS/MgF<sub>2</sub> composite coating.

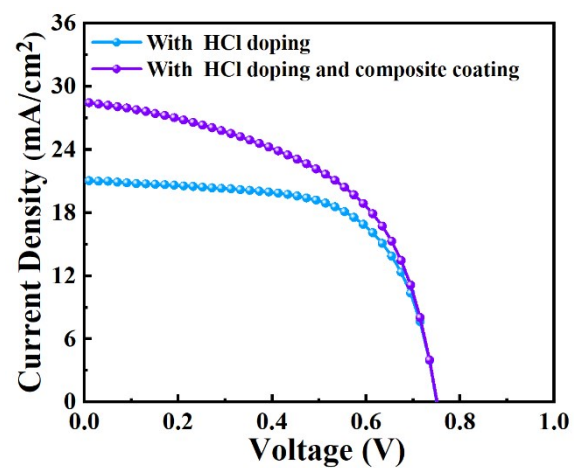

**Figure S12.**  $J$ - $V$  curves of  $\text{Ti}_3\text{C}_2\text{T}_x/\text{GaAs}$  solar cells with HCl doping and  $\text{ZnS}/\text{MgF}_2$  composite coating.
